# Supplementary material
Source: Springer Nature journal article supplement (http://www.springermedizin.de/resource/supplementary/12984_2009_191_MOESM2_ESM.pdf/9605500)

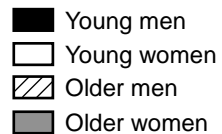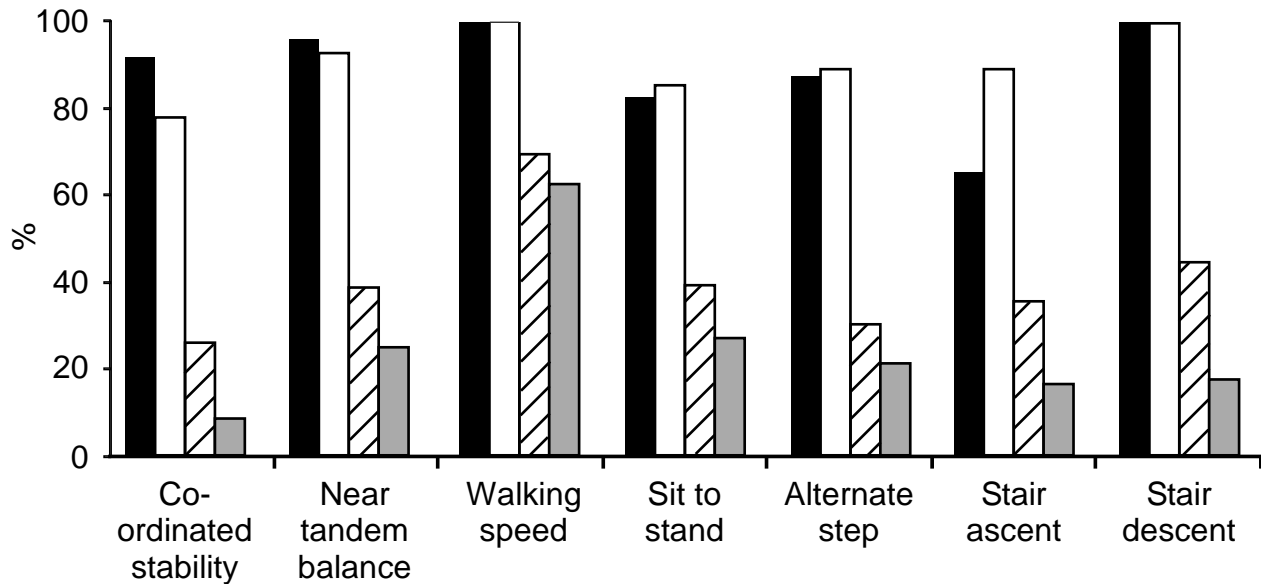

Supplement: MOESM2 [file 9605500]
